# Supplementary material for: Characterization of Calflagin, a Flagellar Calcium-Binding Protein from Trypanosoma congolense
Source: PubMed Central journal article supplement (PMC4824491; doi:10.1371/journal.pntd.0004510), 2016-04-07
Supplement: pntd.0004510.s002.pdf [file pntd.0004510.s002.pdf]

**Tc6/42.6.4, Heavy chain, V region, IgG<sub>2b</sub>**  
**Closest Germline gene = IGHV1S52\*01**

**Protein:**

. . . WNFQVQLQESGAEIVRPGTSVKVSKASGYVLRNYLIEWVKQRPGQGLEWIGVINPGSGNT  
DYNEKFKGKATLTADKSSRTAYMQLSSLTSDDSAVYFCARGLWGYFDYWGQGTTLTVSSAKTTP  
PSVYPLAPGXGDTTV . . .

**DNA:**

. . . TGGAAATTTTGAGGTGCAGCTGCAGGAGTCTGGAGCTGAACTGGTAAGGCCTGGGACTTCAG  
TGAAGGTGTCCTGCAAGGCTTCTGGATACGTCCTCAGAAATTACTTGATAGAGTGGGTAAAGCA  
GAGGCCTGGACAGGGCCTTGAGTGGATTGGAGTGATTAATCCTGGAAGTGGCAATACTGACTAC  
AATGAGAAGTTCAAGGGCAAGGCAACACTGACTGCAGACAAATCCTCCAGAAGTGCCTACATGC  
AGCTCAGCAGTCTGACATCTGATGACTCTGCGGTTTATTTCTGTGCAAGAGGACTTTGGGGTTA  
TTTTGACTACTGGGGCCAAGGCACCACTCTCACAGTCTCCTCAGCCAAAACAACACCCCATCA  
GTCTATCCACTGGCCCTGGGTGNGGAGATACAACACTGTC . . . .

**Tc6/42.6.4, Light chain, V region, Kappa**  
**Closest Germline gene = IGKV8-27\*01**

**Protein:**

. . . LLFWVSGTCGNIMMTQSPSSLAVSAGEKVTMSCKSSRSVLYSSNQKNYLAWYQQKPGQSPK  
LLIYWASTRESGVPDRFTGSGSGTDFTLTISVQVEDLAVYYCHQYLSSRTFGGXP . . .

**DNA:**

. . . TTGCTGTTCTGGGTATCTGGTACCTGTGGGAACATTATGATGACACAGTCGCCATCATCTC  
TGGCTGTGTCTGCAGGAGAAAAGTCACTATGAGCTGTAAGTCCAGTCGAAGTGT TTTTATACAG  
TTCAAATCAGAAGA ACTACTTGGCCTGGTACCAGCAGAAACCAGGGCAGTCTCCTAAACTGCTG  
ATCTACTGGGCATCCACTAGGGAATCTGGTGTCCCTGATCGCTTCACAGGCAGTGGATCTGGGA  
CAGATTTTACTCTTACCATCAGCAGTGTCAAGTTGAAGACCTGGCAGTTTATTACTGTCATCA  
ATACCTCTCCTCGCGGACGTTTCGGTGGNNACCA . . . . .
